# Supplementary material
Source: publisher figshare collection journal article supplement (https://acs.figshare.com/ndownloader/files/4025644)
Supplement: Supplementary file 1 [file 4025644]

#\#CIF_1.1
 
#  CIF produced by WinGX routine CIF_UPDATE
#  Created on 2013-04-19 at 11:40:36
#  Using CIFtbx version 2.6.2 16 Jun 1998
 
#  Dictionary name : cif_core.dic
#  Dictionary vers : 2.4
#  Request file    : c:\program files\wingx\files\archive.reqdat
#  CIF files read  : msi49 struct
 
#------------------ SECTION 1. GLOBAL INFORMATION ---------------------------#
 
data_global
_publ_requested_journal          'j. O'

#------------------ AUTHOR DETAILS -------------------------------------------#

# Name and address of author for correspondence

_publ_contact_author_name        'Vincent Levacher'
_publ_contact_author_address     
;Normandie Univ, 
COBRA, UMR 6014 et FR 3038; 
Univ Rouen; 
INSA Rouen; 
CNRS, 
IRCOF, 
1 rue Tesni\`ere, 
76821 Mont Saint Aignan cedex, France
;
_publ_contact_author_email       Vincent.levacher@insa-rouen.fr
_publ_contact_author_phone       00(000)0000000
_publ_contact_author_fax         00(000)0000000
loop_
_publ_author_name
_publ_author_address
'Postikova, Svetlana'
;Normandie Univ, 
COBRA, UMR 6014 et FR 3038; 
Univ Rouen; 
INSA Rouen; 
CNRS, 
IRCOF, 
1 rue Tesni\`ere, 
76821 Mont Saint Aignan cedex, France
;
'Sabbah, Mohamad'
;Normandie Univ, 
COBRA, UMR 6014 et FR 3038; 
Univ Rouen; 
INSA Rouen; 
CNRS, 
IRCOF, 
1 rue Tesni\`ere, 
76821 Mont Saint Aignan cedex, France
;
'Wightman, Daniel'
;Normandie Univ, 
COBRA, UMR 6014 et FR 3038; 
Univ Rouen; 
INSA Rouen; 
CNRS, 
IRCOF, 
1 rue Tesni\`ere, 
76821 Mont Saint Aignan cedex, France
;
'Nguyen, Ich Tuan'
;Normandie Univ, 
COBRA, UMR 6014 et FR 3038; 
Univ Rouen; 
INSA Rouen; 
CNRS, 
IRCOF, 
1 rue Tesni\`ere, 
76821 Mont Saint Aignan cedex, France
;
'Sanselme, Morgane'
;Laboratoire SMS-Unit\'e de cristallog\`en\`ese 
IRCOF, 
1 rue Tesni\`ere, 
76821 Mont Saint Aignan cedex, France
;
'Besson, Thierry'
;Normandie Univ, 
COBRA, UMR 6014 et FR 3038; 
Univ Rouen; INSA Rouen; 
CNRS,
 IRCOF,
 1 rue Tesni\`ere, 
76821 Mont Saint Aignan cedex, 
France.
;
'Bri\`ere, Jean-Fran\,cois'
;Normandie Univ, 
COBRA, UMR 6014 et FR 3038; 
Univ Rouen; INSA Rouen; 
CNRS,
 IRCOF,
 1 rue Tesni\`ere, 
76821 Mont Saint Aignan cedex, 
France.
;
'Oudeyer, Sylvain'
;Normandie Univ, 
COBRA, UMR 6014 et FR 3038; 
Univ Rouen; INSA Rouen; 
CNRS,
 IRCOF,
 1 rue Tesni\`ere, 
76821 Mont Saint Aignan cedex, 
France.
;
'Levacher, Vincent'
;Normandie Univ, 
COBRA, UMR 6014 et FR 3038; 
Univ Rouen; INSA Rouen; 
CNRS,
 IRCOF,
 1 rue Tesni\`ere, 
76821 Mont Saint Aignan cedex, 
France.
;

#------------------ AUDIT DETAILS -------------------------------------------#

_audit_creation_date             2013-04-19
_audit_creation_method           'WinGX routine CIF_UPDATE'
_audit_conform_dict_name         cif_core.dic
_audit_conform_dict_version      2.4
_audit_conform_dict_location     ftp://ftp.iucr.org/pub/cif_core.dic
_audit_update_record             ?


# Insert blank lines between references

_publ_section_references         
;
Blessing, R. H. (1995) Acta Cryst., A51, 33-38.
 
Blessing, R. H. (1987) Cryst. Rev. 1, 3-58.
 
Blessing, R. H. (1989) J. Appl. Cryst. 22, 396-397.
 
Bruker (2007) APEX2 (Version 2.1-4), SAINT (version 7.34A), SADABS
(version 2007/4), BrukerAXS Inc, Madison, Wisconsin, USA.
 
Cremer, D. & Pople, J.A. (1975). J. Am. Chem. Soc. 97, 1354-1358.
 
Flack H. D. & Bernardinelli, G. (71999). Acta Cryst. A55, 908-915.
 
Flack H. D. & Bernardinelli, G. (2000). J. Appl. Cryst. 33, 1143-1148.
 
Lehman, M. S. and Larsen, F. K. (1974) Acta. Cryst. A30, 580
 
LePage, Y. (1987). J. Appl. Cryst. 20, 264-269.
 
North, A. C. T., Phillips, D. C. & Mathews, F. S. (1968) Acta Cryst,
 A24, 351-359
 
Streltsov, V. A. & Zavodnik, V. E. (1989) Sov. Phys. Crystallogr.
 34, 824-828
 
Streltsov, V. A. & Zavodnik, V. E. (1990) Sov. Phys. Crystallogr.
 35, 281.
 
ABSCOR: Higashi, T. (1995). ABSCOR. Rigaku Corporation, Tokyo, Japan.
 
APEX, APEX2, SMART, SAINT, SAINT-Plus: Bruker (2007). Program name(s).
Bruker AXS Inc., Madison, Wisconsin, USA.
[Older versions (pre-1997) should refer to Siemens Analytical X-ray
Instruments Inc. instead of Bruker AXS.]
 
CAD-4 Software: Enraf-Nonius (1989). CAD-4 Software (or CAD-4 EXPRESS).
Enraf-Nonius, Delft, The Netherlands.
 
Cambridge Structural Database: Allen, F. R. (2002). Acta Cryst. B58, 380-388.
 
CAMERON: Watkin, D. J., Prout, C. K. & Pearce, L. J. (1996). CAMERON.
Chemical Crystallography Laboratory, Oxford, England.
 
CrysAlis CCD, CrysAlis RED and associated programs: Oxford Diffraction (2006).
Program name(s). Oxford Diffraction Ltd, Abingdon, England.
 
CRYSTALS: Betteridge, P. W., Carruthers, J. R., Cooper, R. I., Prout, K. &
Watkin, D. J. (2003). J. Appl. Cryst. 36, 1487.
 
COLLECT: Nonius [or Hooft, R. W. W.] (1998). COLLECT. Nonius BV, Delft,
The Netherlands.
 
DENZO/SCALEPACK:  Otwinowski, Z. & Minor, W. (1997). Methods in Enzymology,
Vol. 276, Macromolecular Crystallography, Part A, edited by C. W. Carter Jr
& R. M. Sweet, pp. 307-326. New York: Academic Press.
 
DIAMOND: Brandenburg, K. [or Brandenburg, K. & Putz, H., or Brandenburg, K.
& Berndt, M.] (1999). DIAMOND. Crystal Impact GbR, Bonn, Germany.
 
DIF4 and REDU4: Stoe & Cie (1991). Program name(s). Stoe & Cie, Darmstadt,
Germany.
 
DIFABS: Walker, N. &  Stuart, D. (1983). Acta Cryst., A39, 158 - 166.
 
DIRAX: Duisenberg, A. J. M. (1992). J. Appl. Cryst. 25, 92-96.
 
DIRDIF99: Beurskens, P.T., Beurskens, G., de Gelder, R., Garci\'ia-Granda,
S., Gould, R.O., Israel, R. & Smits, J.M.M. (1999) The DIRDIF-99 program
system, Technical Report of the Crystallography Laboratory, University of
Nijmegen, The Netherlands.
 
enCIFer: Allen, F. H., Johnson, O., Shields, G. P., Smith, B. R. & Towler,
M. (2004). J. Appl. Cryst. 37, 335-338.
 
EVALCCD: Duisenberg, A. J. M., Kroon-Batenburg, L. M. J. & Schreurs,
A. M. M. (2003). J. Appl. Cryst. 36, 220-229.
 
JANA2000: Petricek, V. & Dusek, M. (2000). JANA2000. Institute of Physics,
Czech Academy of Sciences, Prague, Czech Republic.
 
Mercury: Macrae, C. F., Edgington, P. R., McCabe, P., Pidcock, E., Shields,
G. P., Taylor, R., Towler, M. & van de Streek, J. (2006). J. Appl. Cryst.
39, 453-457.
 
Mogul: Bruno, I. J., Cole, J. C., Kessler, M., Luo, J., Motherwell,
W. D. S., Purkis, L. H., Smith, B. R., Taylor, R., Cooper, R. I., Harris,
S. E. & Orpen, A. G. (2004). J. Chem. Inf. Comput. Sci. 44, 2133-2144.
 
ORTEPII: Johnson, C. K. (1976). ORTEPII. Report ORNL-5138. Oak Ridge
National Laboratory, Tennessee, USA.
 
ORTEPIII:  Burnett, M. N. & Johnson, C. K. (1996). ORTEPIII.
Report ORNL-6895. Oak Ridge National Laboratory, Tennessee, USA.
 
ORTEP-3: Farrugia, L. J. (1997). J. Appl. Cryst. 30, 565.
 
PARST: Nardelli, M. (1995). J. Appl. Cryst. 28, 659.
 
PLATON: Spek, A. L. (2003). J. Appl. Cryst. 36, 7-13.
 
PROCESS: Rigaku (1996). PROCESS. Rigaku Corporation, Tokyo, Japan.
 
PROCESS-AUTO: Rigaku (1998). PROCESS-AUTO. Rigaku Corporation, Tokyo, Japan.
 
publCIF: Westrip, S. P. (2008). publCIF. In preparation.
 
SADABS, TWINABS: Bruker (2001). Program name. Bruker AXS Inc., Madison,
Wisconsin, USA. or Sheldrick, G. M. (1996). Program name. University of
Gottingen, Germany.
 
SHELX Sheldrick, G. M. (2008). Acta Cryst. A64, 112-122.
 
SIR92: Altomare, A., Cascarano, G., Giacovazzo, C., Guagliardi, A., Burla,
M. C., Polidori, G. & Camalli, M. (1994). J. Appl. Cryst. 27, 435.
 
SIR97: Altomare, A., Burla, M. C., Camalli, M., Cascarano, G. L.,
Giacovazzo, C., Guagliardi, A., Moliterni, A. G. G., Polidori, G. &
Spagna, R. (1999). J. Appl. Cryst. 32, 115-119.
 
SIR2002: Burla, M. C., Camalli, M., Carrozzini, B., Cascarano, G. L.,
Giacovazzo, C., Polidori, G. & Spagna, R. (2003). J. Appl. Cryst. 36, 1103.
 
SUPERFLIP Palatinus, L. & Chapuis, G. (2007) J. Appl. Cryst. 40, 786-790.
 
TEXSAN: Molecular Structure Corporation & Rigaku (2000). TEXSAN. MSC,
The Woodlands, Texas, USA, and Rigaku Corporation, Tokyo, Japan.
 
WinGX: Farrugia, L. J. (1999). J. Appl. Cryst. 32, 837-838.
 
X-AREA, X-RED, X-RED32, X-SHAPE:  Stoe & Cie (2002). Program name(s).
Stoe & Cie GmbH, Darmstadt, Germany.
 
XCAD4: Harms, K. & Wocadlo, S. (1995). XCAD4. University of Marburg, Germany.
 
XSCANS: Siemens (1994). XSCANS. Siemens Analytical X-ray Instruments Inc.,
Madison, Wisconsin, USA.
 
;

#------------------  SECTION 2. COMPOUND(S) DETAILS -------------------------#
 
data_msi49
 
_audit_creation_date                    2013-04-19T11:40:36-00:00
_audit_creation_method                  'WinGX routine CIF_UPDATE'
_audit_conform_dict_name                cif_core.dic
_audit_conform_dict_version             2.4
_audit_conform_dict_location            ftp://ftp.iucr.org/pub/cif_core.dic
_publ_requested_category                FO
 
#----------------------------------------------------------------------------#
#                   CHEMICAL INFORMATION                                     #
#----------------------------------------------------------------------------#
 
_chemical_name_systematic
;
 ?
;
_chemical_formula_moiety                'C21 H18 N2 O2'
_chemical_formula_sum                   'C21 H18 N2 O2'
_chemical_formula_weight                330.37
_chemical_compound_source               'synthesis as described'
_chemical_absolute_configuration        syn
 
#----------------------------------------------------------------------------#
#                   UNIT CELL INFORMATION                                    #
#----------------------------------------------------------------------------#
 
_symmetry_cell_setting                  monoclinic
_symmetry_space_group_name_H-M          'P 21'
_symmetry_space_group_name_Hall         'P 2yb'
_symmetry_Int_Tables_number             4
loop_
    _symmetry_equiv_pos_as_xyz
'x, y, z'
'-x, y+1/2, -z'
 
_cell_length_a                          9.5195(17)
_cell_length_b                          8.2289(14)
_cell_length_c                          11.0119(19)
_cell_angle_alpha                       90
_cell_angle_beta                        98.595(3)
_cell_angle_gamma                       90
_cell_volume                            852.9(3)
_cell_formula_units_Z                   2
_cell_measurement_temperature           293(2)
_cell_measurement_reflns_used           0
_cell_measurement_theta_min             0
_cell_measurement_theta_max             0
_cell_measurement_wavelength            0.71073
 
#----------------------------------------------------------------------------#
#                   CRYSTAL INFORMATION                                      #
#----------------------------------------------------------------------------#
 
_exptl_crystal_description              prism
_exptl_crystal_colour                   colourless
_exptl_crystal_size_max                 0
_exptl_crystal_size_mid                 0
_exptl_crystal_size_min                 0
_exptl_crystal_density_diffrn           1.286
_exptl_crystal_density_method           'not measured'
_exptl_crystal_F_000                    348
_exptl_special_details
;
 ?
;
 
#----------------------------------------------------------------------------#
#                   ABSORPTION CORRECTION                                    #
#----------------------------------------------------------------------------#
 
_exptl_absorpt_coefficient_mu           0.084
_exptl_absorpt_correction_type          none
 
#----------------------------------------------------------------------------#
#                   DATA COLLECTION                                          #
#----------------------------------------------------------------------------#
 
_diffrn_ambient_temperature             293(2)
_diffrn_radiation_wavelength            0.71073
_diffrn_radiation_type                  MoK\a
_diffrn_radiation_monochromator         graphite
_diffrn_radiation_probe                 x-ray
_diffrn_reflns_av_R_equivalents         0.0288
_diffrn_reflns_av_unetI/netI            0.0366
_diffrn_reflns_number                   6696
_diffrn_reflns_limit_h_min              -11
_diffrn_reflns_limit_h_max              11
_diffrn_reflns_limit_k_min              -10
_diffrn_reflns_limit_k_max              10
_diffrn_reflns_limit_l_min              -13
_diffrn_reflns_limit_l_max              13
_diffrn_reflns_theta_min                1.87
_diffrn_reflns_theta_max                26.36
_diffrn_reflns_theta_full               26.36
_diffrn_measured_fraction_theta_full
                                        0.994
_diffrn_measured_fraction_theta_max
                                        0.994
_reflns_number_total                    3440
_reflns_number_gt                       3114
_reflns_threshold_expression            >2\s(I)
 
#----------------------------------------------------------------------------#
#                   COMPUTER PROGRAMS USED                                   #
#----------------------------------------------------------------------------#
 
_computing_structure_refinement         'SHELXL-97 (Sheldrick, 2008)'
_computing_molecular_graphics           'Ortep-3 for Windows (Farrugia, 1997)'
_computing_publication_material
                                   'WinGX publication routines (Farrugia, 1999)'
 
#----------------------------------------------------------------------------#
#                   STRUCTURE SOLUTION
#----------------------------------------------------------------------------#
 
_atom_sites_solution_primary            direct
_atom_sites_solution_secondary          difmap
_atom_sites_solution_hydrogens          geom
 
#----------------------------------------------------------------------------#
#                   REFINEMENT INFORMATION                                   #
#----------------------------------------------------------------------------#
 
_refine_special_details
;
 Refinement of F^2^ against ALL reflections.  The weighted R-factor wR and
 goodness of fit S are based on F^2^, conventional R-factors R are based
 on F, with F set to zero for negative F^2^. The threshold expression of
 F^2^ > 2\s(F^2^) is used only for calculating R-factors(gt) etc. and is
 not relevant to the choice of reflections for refinement.  R-factors based
 on F^2^ are statistically about twice as large as those based on F, and R-
 factors based on ALL data will be even larger.
;
_refine_ls_structure_factor_coef        Fsqd
_refine_ls_matrix_type                  full
_refine_ls_weighting_scheme             calc
_refine_ls_weighting_details
         'calc w=1/[\s^2^(Fo^2^)+(0.0624P)^2^+0.0287P] where P=(Fo^2^+2Fc^2^)/3'
_refine_ls_hydrogen_treatment           constr
_refine_ls_extinction_method            none
_refine_ls_number_reflns                3440
_refine_ls_number_parameters            227
_refine_ls_number_restraints            1
_refine_ls_R_factor_all                 0.0448
_refine_ls_R_factor_gt                  0.0405
_refine_ls_wR_factor_ref                0.1055
_refine_ls_wR_factor_gt                 0.1021
_refine_ls_goodness_of_fit_ref          1.072
_refine_ls_restrained_S_all             1.072
_refine_ls_shift/su_max                 0
_refine_ls_shift/su_mean                0
_refine_ls_abs_structure_details
                                    'Flack H D (1983), Acta Cryst. A39, 876-881'
_refine_ls_abs_structure_Flack          -0.3(12)
_refine_diff_density_max                0.182
_refine_diff_density_min                -0.165
_refine_diff_density_rms                0.039
 
#----------------------------------------------------------------------------#
#                   ATOMIC TYPES, COORDINATES AND THERMAL PARAMETERS         #
#----------------------------------------------------------------------------#
 
loop_
    _atom_type_symbol
    _atom_type_description
    _atom_type_scat_dispersion_real
    _atom_type_scat_dispersion_imag
    _atom_type_scat_source
C C 0.0033 0.0016 'International Tables Vol C Tables 4.2.6.8 and 6.1.1.4'
H H 0 0 'International Tables Vol C Tables 4.2.6.8 and 6.1.1.4'
N N 0.0061 0.0033 'International Tables Vol C Tables 4.2.6.8 and 6.1.1.4'
O O 0.0106 0.006 'International Tables Vol C Tables 4.2.6.8 and 6.1.1.4'
 
loop_
    _atom_site_label
    _atom_site_type_symbol
    _atom_site_fract_x
    _atom_site_fract_y
    _atom_site_fract_z
    _atom_site_U_iso_or_equiv
    _atom_site_adp_type
    _atom_site_occupancy
    _atom_site_symmetry_multiplicity
    _atom_site_calc_flag
    _atom_site_refinement_flags
    _atom_site_disorder_assembly
    _atom_site_disorder_group
C1 C 0.55959(17) 0.7806(2) 0.73234(16) 0.0431(4) Uani 1 1 d . . .
C2 C 0.62738(18) 0.8820(2) 0.83405(16) 0.0480(4) Uani 1 1 d . . .
C3 C 0.5585(2) 0.9765(3) 0.9084(2) 0.0648(6) Uani 1 1 d . . .
H3 H 0.4606 0.9881 0.9026 0.078 Uiso 1 1 calc R . .
C4 C 0.6601(3) 1.0528(3) 0.9947(2) 0.0756(7) Uani 1 1 d . . .
H4 H 0.6424 1.1226 1.0571 0.091 Uiso 1 1 calc R . .
C5 C 0.7896(2) 1.0055(3) 0.9698(2) 0.0671(6) Uani 1 1 d . . .
H5 H 0.8765 1.0395 1.0121 0.08 Uiso 1 1 calc R . .
C6 C 0.88664(16) 0.8368(2) 0.81637(16) 0.0456(4) Uani 1 1 d . . .
C7 C 1.00260(19) 0.9358(3) 0.8083(2) 0.0576(5) Uani 1 1 d . . .
H7 H 1.0031 1.0428 0.8356 0.069 Uiso 1 1 calc R . .
C8 C 1.11810(19) 0.8747(3) 0.7592(2) 0.0598(5) Uani 1 1 d . . .
H8 H 1.1967 0.9405 0.755 0.072 Uiso 1 1 calc R . .
C9 C 1.11670(18) 0.7187(3) 0.71717(18) 0.0571(5) Uani 1 1 d . . .
H9 H 1.1944 0.6781 0.6848 0.069 Uiso 1 1 calc R . .
C10 C 0.99983(17) 0.6212(2) 0.72269(17) 0.0495(4) Uani 1 1 d . . .
H10 H 0.9991 0.5154 0.693 0.059 Uiso 1 1 calc R . .
C11 C 0.88259(16) 0.6792(2) 0.77216(15) 0.0420(4) Uani 1 1 d . . .
C12 C 0.75505(16) 0.5683(2) 0.77783(15) 0.0419(4) Uani 1 1 d . . .
C13 C 0.7394(2) 0.5244(3) 0.90920(18) 0.0598(5) Uani 1 1 d . . .
H13A H 0.6529 0.4647 0.9097 0.09 Uiso 1 1 calc R . .
H13B H 0.7368 0.6219 0.9566 0.09 Uiso 1 1 calc R . .
H13C H 0.8186 0.4589 0.9442 0.09 Uiso 1 1 calc R . .
C14 C 0.70496(19) 0.4427(2) 0.58925(17) 0.0509(4) Uani 1 1 d . . .
H14A H 0.6777 0.3391 0.5508 0.061 Uiso 1 1 calc R . .
H14B H 0.7711 0.4962 0.5434 0.061 Uiso 1 1 calc R . .
C15 C 0.57517(17) 0.5485(2) 0.59486(15) 0.0430(4) Uani 1 1 d . . .
H15 H 0.5612 0.622 0.524 0.052 Uiso 1 1 calc R . .
C16 C 0.43811(18) 0.4559(2) 0.60228(16) 0.0457(4) Uani 1 1 d . . .
C17 C 0.32558(18) 0.4695(2) 0.50791(17) 0.0499(4) Uani 1 1 d . . .
H17 H 0.3339 0.5353 0.4407 0.06 Uiso 1 1 calc R . .
C18 C 0.1997(2) 0.3852(3) 0.5127(2) 0.0608(5) Uani 1 1 d . . .
H18 H 0.1245 0.395 0.4487 0.073 Uiso 1 1 calc R . .
C19 C 0.1859(2) 0.2880(3) 0.6109(2) 0.0677(6) Uani 1 1 d . . .
H19 H 0.1018 0.2318 0.6141 0.081 Uiso 1 1 calc R . .
C20 C 0.2976(3) 0.2745(3) 0.7047(3) 0.0783(7) Uani 1 1 d . . .
H20 H 0.2888 0.2093 0.7721 0.094 Uiso 1 1 calc R . .
C21 C 0.4234(2) 0.3570(3) 0.6998(2) 0.0711(6) Uani 1 1 d . . .
H21 H 0.4987 0.3453 0.7635 0.085 Uiso 1 1 calc R . .
N1 N 0.62530(13) 0.64142(17) 0.70679(12) 0.0403(3) Uani 1 1 d . . .
N2 N 0.77217(15) 0.9006(2) 0.87326(14) 0.0503(4) Uani 1 1 d . . .
O1 O 0.44490(12) 0.82020(18) 0.67367(13) 0.0548(3) Uani 1 1 d . . .
O2 O 0.76678(12) 0.42079(15) 0.71496(12) 0.0503(3) Uani 1 1 d . . .
 
loop_
    _atom_site_aniso_label
    _atom_site_aniso_U_11
    _atom_site_aniso_U_22
    _atom_site_aniso_U_33
    _atom_site_aniso_U_23
    _atom_site_aniso_U_13
    _atom_site_aniso_U_12
C1 0.0287(8) 0.0544(9) 0.0482(9) -0.0006(7) 0.0124(6) -0.0026(7)
C2 0.0337(8) 0.0600(11) 0.0518(9) -0.0070(8) 0.0117(7) -0.0040(8)
C3 0.0468(10) 0.0832(15) 0.0679(12) -0.0169(11) 0.0198(9) 0.0025(10)
C4 0.0697(14) 0.0900(17) 0.0703(13) -0.0315(13) 0.0208(11) 0.0003(13)
C5 0.0535(11) 0.0851(14) 0.0626(12) -0.0274(11) 0.0085(9) -0.0100(11)
C6 0.0285(8) 0.0621(11) 0.0460(8) -0.0067(8) 0.0044(6) -0.0051(7)
C7 0.0374(9) 0.0660(12) 0.0687(12) -0.0110(10) 0.0056(8) -0.0118(8)
C8 0.0304(9) 0.0787(14) 0.0703(12) -0.0003(11) 0.0075(7) -0.0171(9)
C9 0.0269(9) 0.0820(14) 0.0640(12) 0.0031(11) 0.0119(8) 0.0011(8)
C10 0.0307(8) 0.0602(11) 0.0581(10) 0.0012(9) 0.0085(7) 0.0043(7)
C11 0.0256(8) 0.0580(10) 0.0421(8) 0.0046(8) 0.0045(6) -0.0014(7)
C12 0.0285(8) 0.0502(9) 0.0467(9) 0.0051(7) 0.0049(6) -0.0017(7)
C13 0.0453(10) 0.0800(14) 0.0536(10) 0.0148(10) 0.0061(8) -0.0095(10)
C14 0.0416(9) 0.0542(10) 0.0581(10) -0.0062(8) 0.0112(7) -0.0034(8)
C15 0.0364(8) 0.0496(9) 0.0432(8) -0.0003(7) 0.0066(6) -0.0063(7)
C16 0.0383(9) 0.0484(10) 0.0502(9) -0.0067(7) 0.0057(7) -0.0085(7)
C17 0.0404(9) 0.0553(11) 0.0542(10) -0.0103(8) 0.0073(7) -0.0006(8)
C18 0.0363(9) 0.0659(13) 0.0781(13) -0.0259(11) 0.0017(8) -0.0050(9)
C19 0.0472(11) 0.0667(13) 0.0923(16) -0.0186(12) 0.0202(11) -0.0225(10)
C20 0.0711(15) 0.0811(15) 0.0814(15) 0.0104(13) 0.0072(12) -0.0368(13)
C21 0.0554(12) 0.0820(15) 0.0709(13) 0.0131(12) -0.0068(9) -0.0280(11)
N1 0.0291(6) 0.0480(8) 0.0436(7) -0.0008(6) 0.0042(5) -0.0033(6)
N2 0.0340(7) 0.0659(10) 0.0519(8) -0.0161(8) 0.0095(6) -0.0069(7)
O1 0.0275(6) 0.0679(8) 0.0680(8) -0.0030(7) 0.0035(5) 0.0036(5)
O2 0.0415(6) 0.0463(6) 0.0629(7) 0.0048(6) 0.0069(5) 0.0014(5)
 
 
#----------------------------------------------------------------------------#
#                   MOLECULAR GEOMETRY                                       #
#----------------------------------------------------------------------------#
 
_geom_special_details
;
 All s.u.'s (except the s.u. in the dihedral angle between two l.s. planes)
 are estimated using the full covariance matrix.  The cell s.u.'s are taken
 into account individually in the estimation of s.u.'s in distances, angles
 and torsion angles; correlations between s.u.'s in cell parameters are only
 used when they are defined by crystal symmetry.  An approximate (isotropic)
 treatment of cell s.u.'s is used for estimating s.u.'s involving l.s. planes.
;
loop_
    _geom_bond_atom_site_label_1
    _geom_bond_atom_site_label_2
    _geom_bond_distance
    _geom_bond_site_symmetry_2
    _geom_bond_publ_flag
C1 O1 1.227(2) . ?
C1 N1 1.354(2) . ?
C1 C2 1.467(3) . ?
C2 C3 1.365(3) . ?
C2 N2 1.390(2) . ?
C3 C4 1.399(3) . ?
C3 H3 0.93 . ?
C4 C5 1.359(3) . ?
C4 H4 0.93 . ?
C5 N2 1.360(3) . ?
C5 H5 0.93 . ?
C6 C11 1.384(3) . ?
C6 C7 1.386(3) . ?
C6 N2 1.435(2) . ?
C7 C8 1.390(3) . ?
C7 H7 0.93 . ?
C8 C9 1.364(3) . ?
C8 H8 0.93 . ?
C9 C10 1.380(3) . ?
C9 H9 0.93 . ?
C10 C11 1.397(2) . ?
C10 H10 0.93 . ?
C11 C12 1.527(2) . ?
C12 O2 1.410(2) . ?
C12 N1 1.487(2) . ?
C12 C13 1.520(3) . ?
C13 H13A 0.96 . ?
C13 H13B 0.96 . ?
C13 H13C 0.96 . ?
C14 O2 1.432(2) . ?
C14 C15 1.521(2) . ?
C14 H14A 0.97 . ?
C14 H14B 0.97 . ?
C15 N1 1.468(2) . ?
C15 C16 1.524(2) . ?
C15 H15 0.98 . ?
C16 C21 1.371(3) . ?
C16 C17 1.381(2) . ?
C17 C18 1.393(3) . ?
C17 H17 0.93 . ?
C18 C19 1.367(3) . ?
C18 H18 0.93 . ?
C19 C20 1.371(4) . ?
C19 H19 0.93 . ?
C20 C21 1.384(3) . ?
C20 H20 0.93 . ?
C21 H21 0.93 . ?
 
loop_
    _geom_angle_atom_site_label_1
    _geom_angle_atom_site_label_2
    _geom_angle_atom_site_label_3
    _geom_angle
    _geom_angle_site_symmetry_1
    _geom_angle_site_symmetry_3
    _geom_angle_publ_flag
O1 C1 N1 121.18(16) . . ?
O1 C1 C2 120.41(16) . . ?
N1 C1 C2 118.40(15) . . ?
C3 C2 N2 107.11(17) . . ?
C3 C2 C1 125.86(17) . . ?
N2 C2 C1 127.03(15) . . ?
C2 C3 C4 108.52(19) . . ?
C2 C3 H3 125.7 . . ?
C4 C3 H3 125.7 . . ?
C5 C4 C3 106.83(19) . . ?
C5 C4 H4 126.6 . . ?
C3 C4 H4 126.6 . . ?
C4 C5 N2 109.38(18) . . ?
C4 C5 H5 125.3 . . ?
N2 C5 H5 125.3 . . ?
C11 C6 C7 120.63(16) . . ?
C11 C6 N2 120.88(16) . . ?
C7 C6 N2 118.48(17) . . ?
C6 C7 C8 119.7(2) . . ?
C6 C7 H7 120.1 . . ?
C8 C7 H7 120.1 . . ?
C9 C8 C7 120.29(18) . . ?
C9 C8 H8 119.9 . . ?
C7 C8 H8 119.9 . . ?
C8 C9 C10 119.94(18) . . ?
C8 C9 H9 120 . . ?
C10 C9 H9 120 . . ?
C9 C10 C11 120.99(19) . . ?
C9 C10 H10 119.5 . . ?
C11 C10 H10 119.5 . . ?
C6 C11 C10 118.37(16) . . ?
C6 C11 C12 121.73(15) . . ?
C10 C11 C12 119.89(16) . . ?
O2 C12 N1 102.15(12) . . ?
O2 C12 C13 106.78(15) . . ?
N1 C12 C13 113.90(15) . . ?
O2 C12 C11 111.86(13) . . ?
N1 C12 C11 109.87(13) . . ?
C13 C12 C11 111.87(14) . . ?
C12 C13 H13A 109.5 . . ?
C12 C13 H13B 109.5 . . ?
H13A C13 H13B 109.5 . . ?
C12 C13 H13C 109.5 . . ?
H13A C13 H13C 109.5 . . ?
H13B C13 H13C 109.5 . . ?
O2 C14 C15 104.59(14) . . ?
O2 C14 H14A 110.8 . . ?
C15 C14 H14A 110.8 . . ?
O2 C14 H14B 110.8 . . ?
C15 C14 H14B 110.8 . . ?
H14A C14 H14B 108.9 . . ?
N1 C15 C14 99.68(12) . . ?
N1 C15 C16 112.89(13) . . ?
C14 C15 C16 115.03(15) . . ?
N1 C15 H15 109.6 . . ?
C14 C15 H15 109.6 . . ?
C16 C15 H15 109.6 . . ?
C21 C16 C17 118.60(17) . . ?
C21 C16 C15 121.83(16) . . ?
C17 C16 C15 119.56(17) . . ?
C16 C17 C18 120.42(19) . . ?
C16 C17 H17 119.8 . . ?
C18 C17 H17 119.8 . . ?
C19 C18 C17 120.43(19) . . ?
C19 C18 H18 119.8 . . ?
C17 C18 H18 119.8 . . ?
C18 C19 C20 119.18(19) . . ?
C18 C19 H19 120.4 . . ?
C20 C19 H19 120.4 . . ?
C19 C20 C21 120.6(2) . . ?
C19 C20 H20 119.7 . . ?
C21 C20 H20 119.7 . . ?
C16 C21 C20 120.8(2) . . ?
C16 C21 H21 119.6 . . ?
C20 C21 H21 119.6 . . ?
C1 N1 C15 120.81(14) . . ?
C1 N1 C12 127.29(14) . . ?
C15 N1 C12 111.80(13) . . ?
C5 N2 C2 108.15(15) . . ?
C5 N2 C6 124.17(15) . . ?
C2 N2 C6 127.36(15) . . ?
C12 O2 C14 108.35(13) . . ?
 
loop_
    _geom_torsion_atom_site_label_1
    _geom_torsion_atom_site_label_2
    _geom_torsion_atom_site_label_3
    _geom_torsion_atom_site_label_4
    _geom_torsion
    _geom_torsion_site_symmetry_1
    _geom_torsion_site_symmetry_2
    _geom_torsion_site_symmetry_3
    _geom_torsion_site_symmetry_4
    _geom_torsion_publ_flag
O1 C1 C2 C3 30.6(3) . . . . ?
N1 C1 C2 C3 -148.1(2) . . . . ?
O1 C1 C2 N2 -149.44(19) . . . . ?
N1 C1 C2 N2 31.8(3) . . . . ?
N2 C2 C3 C4 -0.5(3) . . . . ?
C1 C2 C3 C4 179.4(2) . . . . ?
C2 C3 C4 C5 1.1(3) . . . . ?
C3 C4 C5 N2 -1.2(3) . . . . ?
C11 C6 C7 C8 -2.2(3) . . . . ?
N2 C6 C7 C8 176.82(17) . . . . ?
C6 C7 C8 C9 1.1(3) . . . . ?
C7 C8 C9 C10 0.4(3) . . . . ?
C8 C9 C10 C11 -0.7(3) . . . . ?
C7 C6 C11 C10 1.9(3) . . . . ?
N2 C6 C11 C10 -177.16(15) . . . . ?
C7 C6 C11 C12 -178.91(16) . . . . ?
N2 C6 C11 C12 2.1(2) . . . . ?
C9 C10 C11 C6 -0.4(3) . . . . ?
C9 C10 C11 C12 -179.64(15) . . . . ?
C6 C11 C12 O2 173.09(14) . . . . ?
C10 C11 C12 O2 -7.7(2) . . . . ?
C6 C11 C12 N1 60.4(2) . . . . ?
C10 C11 C12 N1 -120.42(17) . . . . ?
C6 C11 C12 C13 -67.2(2) . . . . ?
C10 C11 C12 C13 112.05(19) . . . . ?
O2 C14 C15 N1 30.34(16) . . . . ?
O2 C14 C15 C16 -90.66(16) . . . . ?
N1 C15 C16 C21 -50.7(2) . . . . ?
C14 C15 C16 C21 62.8(2) . . . . ?
N1 C15 C16 C17 130.09(17) . . . . ?
C14 C15 C16 C17 -116.43(18) . . . . ?
C21 C16 C17 C18 0.5(3) . . . . ?
C15 C16 C17 C18 179.70(16) . . . . ?
C16 C17 C18 C19 0.0(3) . . . . ?
C17 C18 C19 C20 0.0(3) . . . . ?
C18 C19 C20 C21 -0.5(4) . . . . ?
C17 C16 C21 C20 -1.0(4) . . . . ?
C15 C16 C21 C20 179.8(2) . . . . ?
C19 C20 C21 C16 1.0(4) . . . . ?
O1 C1 N1 C15 11.1(2) . . . . ?
C2 C1 N1 C15 -170.17(14) . . . . ?
O1 C1 N1 C12 -172.60(16) . . . . ?
C2 C1 N1 C12 6.1(2) . . . . ?
C14 C15 N1 C1 163.09(15) . . . . ?
C16 C15 N1 C1 -74.37(19) . . . . ?
C14 C15 N1 C12 -13.74(17) . . . . ?
C16 C15 N1 C12 108.79(16) . . . . ?
O2 C12 N1 C1 175.42(15) . . . . ?
C13 C12 N1 C1 60.7(2) . . . . ?
C11 C12 N1 C1 -65.7(2) . . . . ?
O2 C12 N1 C15 -8.00(16) . . . . ?
C13 C12 N1 C15 -122.74(17) . . . . ?
C11 C12 N1 C15 110.87(15) . . . . ?
C4 C5 N2 C2 0.9(3) . . . . ?
C4 C5 N2 C6 174.8(2) . . . . ?
C3 C2 N2 C5 -0.2(2) . . . . ?
C1 C2 N2 C5 179.85(19) . . . . ?
C3 C2 N2 C6 -173.89(19) . . . . ?
C1 C2 N2 C6 6.2(3) . . . . ?
C11 C6 N2 C5 144.1(2) . . . . ?
C7 C6 N2 C5 -34.9(3) . . . . ?
C11 C6 N2 C2 -43.1(3) . . . . ?
C7 C6 N2 C2 137.8(2) . . . . ?
N1 C12 O2 C14 28.59(16) . . . . ?
C13 C12 O2 C14 148.45(13) . . . . ?
C11 C12 O2 C14 -88.86(15) . . . . ?
C15 C14 O2 C12 -38.70(17) . . . . ?
 
# END of CIF
